# Supplementary material
Source: PubMed Central journal article supplement (PMC9126007)
Supplement: awab256_Supplementary_Data.pdf [file awab256_Supplementary_Data.pdf]

**Supplementary Figure 1. Persistent ICP elevation does not increase PID occurrence**

(A) Timeline shows the timing of occurrence of SDs at ICP levels of <10 (normal, green symbols), 20 (blue symbols) or 30 mmHg (red symbols). Each horizontal line is one animal (n=5/group).

(B) Whisker-bar plots show the average SD frequency per hour at three ICP levels throughout the 60-minute recordings (one-way ANOVA).

(C) Bar graphs show the 3-minute SD incidence at three persistent ICP levels ( $\chi^2$ ), as shown in Figure 2B for ICP spikes.

(D) Cumulative SD occurrence rate per animal at ICP levels of <10 (normal, green), 20 (blue) or 30 mmHg (red) during 60 minutes of recording.

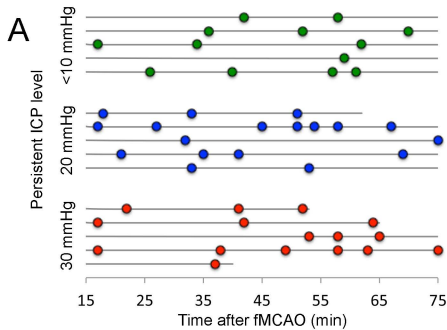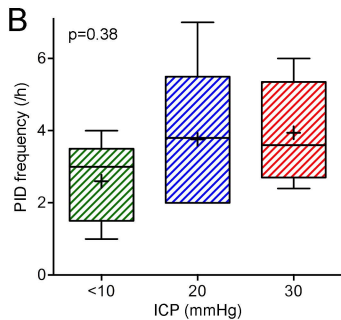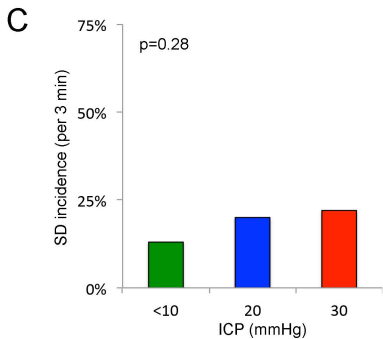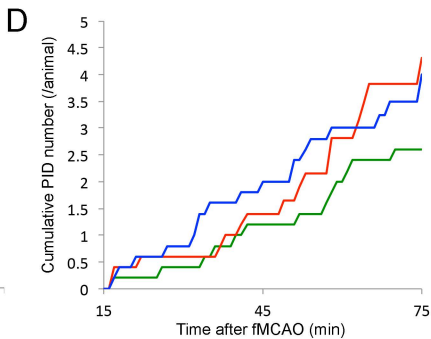

**Supplementary Figure 2. Mild and brief ICP spikes worsen stroke outcome**

(A) Cumulative SD occurrence per animal in the normal ICP group (<10 mmHg, green) or with five ICP spikes (30 mmHg for 30 seconds) is shown during 60 minutes fMCAO (n=5 each). \*p<0.05 vs. normal ICP.

(B) Representative TTC-stained 1 mm-thick coronal slices show ischemic infarct in MCA territory (white tissue) in two animals with normal ICP or with ICP spikes.

(C) Whisker-box plots show indirect infarct volume (left) and neurological deficit score (right) in normal ICP (green) and ICP spike (red) groups (n=5 each; Student's t-test).

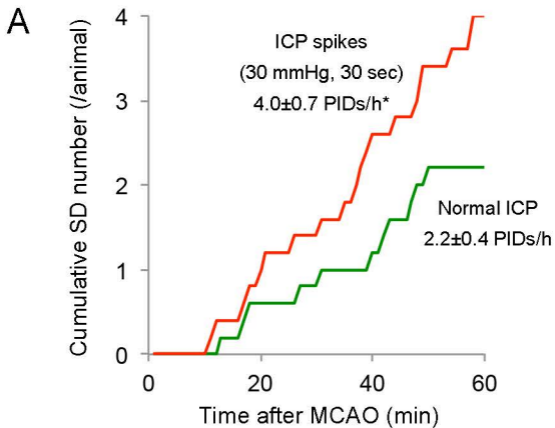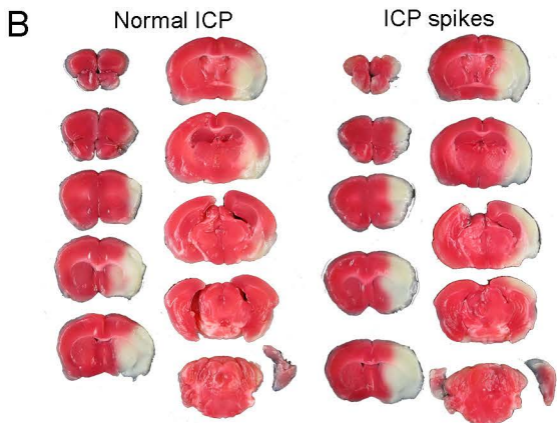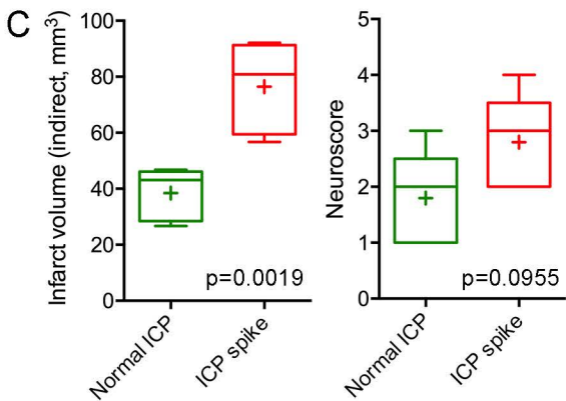

**Supplementary Figure 3. Effects of ICP elevations on systemic blood pressure and cerebral perfusion pressure after fMCAO**

(A) Transient ICP elevations for 3 minutes (upper row) or 30 seconds (lower row) caused an acute reduction in cerebral perfusion pressure (CPP) and a slower rise in systemic blood pressure (BP), in proportion to the ICP level (n=5 each).

(B) Persistent ICP elevation caused an initial drop in CPP, as observed with ICP spikes, followed by a sustained BP rise (Cushing response), which offset this initial CPP drop and elevated the CPP. In normal ICP group (<10 mmHg), BP and CPP were stable over the duration of recordings (n=5 each).

**A**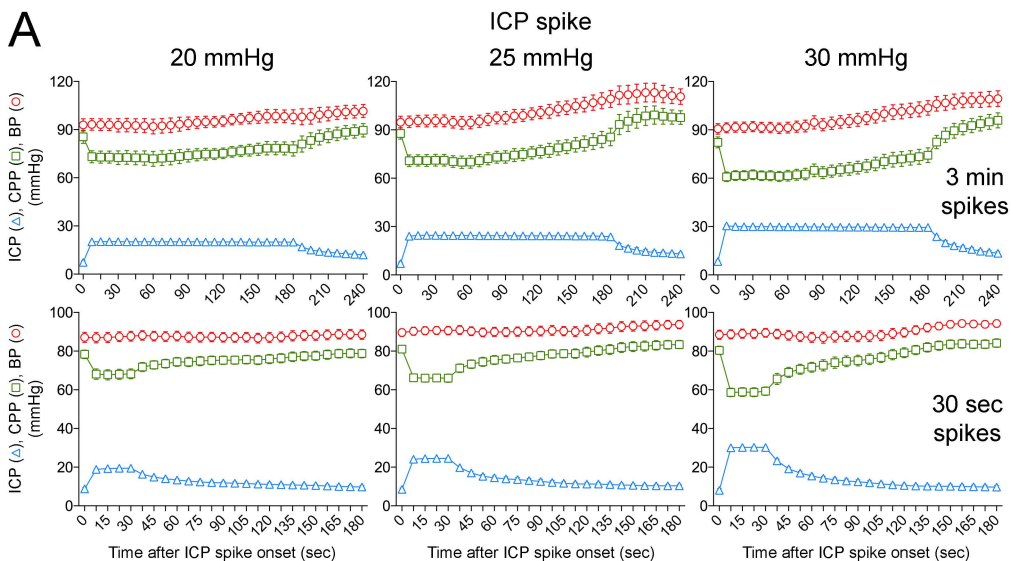**B**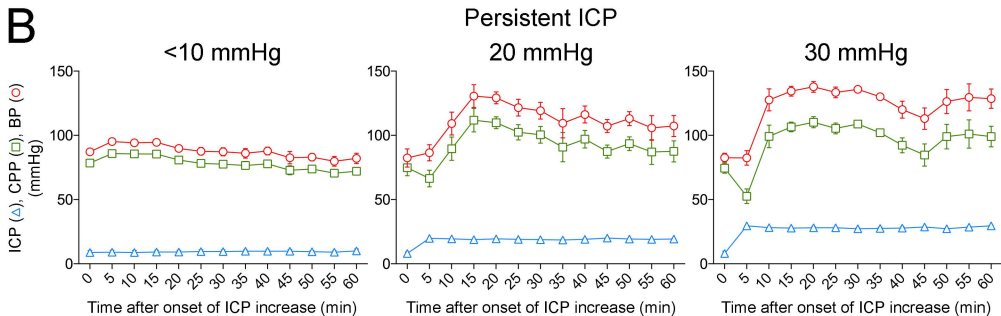

**Supplementary Figure 4. Effects of ICP elevations on cortical oxyhemoglobin and deoxyhemoglobin concentrations**

(A) Tracing from a representative experiment showing the effect of 30 second, 30 mmHg ICP spikes on CBF, oxyhemoglobin and deoxyhemoglobin concentrations at the SD origin. All 5 ICP spikes triggered a SD (yellow circles) in this experiment, which caused a precipitous drop in CBF and oxyhemoglobin. During the ICP spike, there as a small CBF drop and minimal change in oxyhemoglobin and deoxyhemoglobin concentrations. Dashed lines indicate the period of ICP elevation.

(B) Summary data showing CBF, oxyhemoglobin and deoxyhemoglobin concentrations within a region of interest placed in penumbra 30 seconds before and during 30 second, 30 mmHg ICP spikes (n=4;  $p>0.05$ , one-way ANOVA for repeated measures).

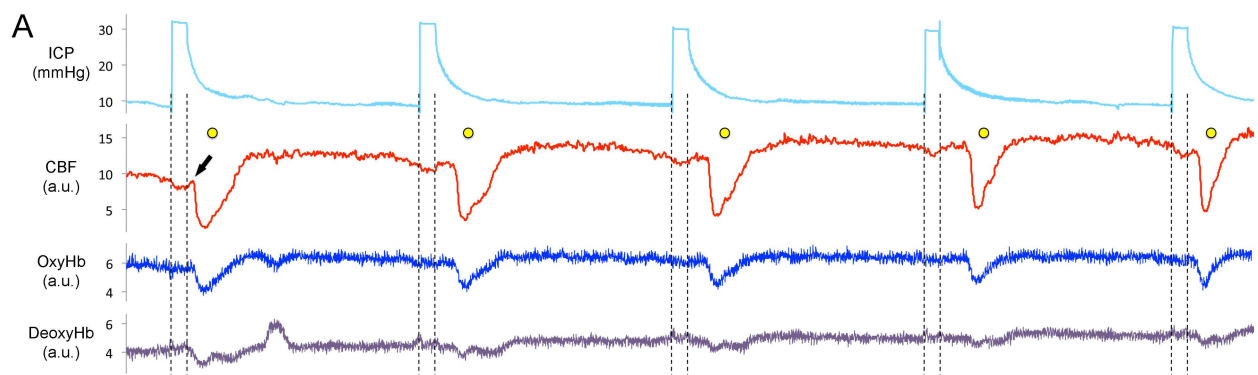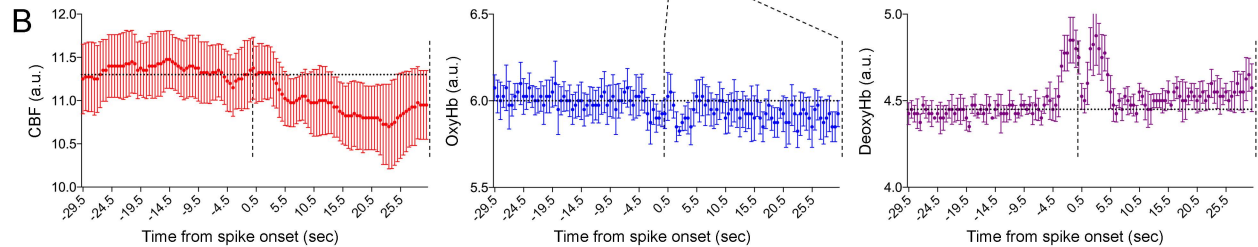



## **Supplementary Figure 5. Effects of ICP elevation on the hypoperfusion response to**

### **SDs**

CBF changes during SD in ischemic penumbra (residual CBF ~30%) were calculated by measuring the hypoperfusion response to an SD (left panel, gray shaded area) that occurred spontaneously (circles) or triggered by a 3-minute or 30-second ICP spike at different ICP levels (middle and right panels). There was a slight but statistically insignificant worsening of hypoperfusion during SDs triggered by ICP spikes (regardless of the ICP level) compared with spontaneous SDs that occurred under normal ICP (two-way ANOVA for repeated measures).

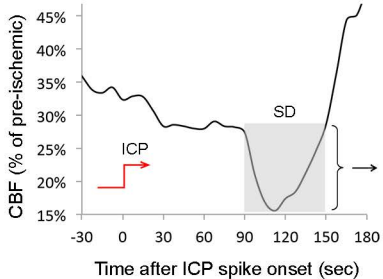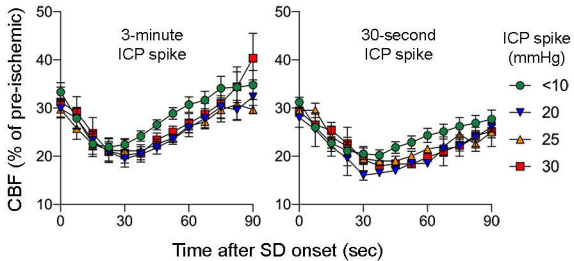

**Supplementary Table 1. Arterial blood gas values.**

|                        | <b>pH</b>   | <b>pCO<sub>2</sub></b> | <b>pO<sub>2</sub></b> |
|------------------------|-------------|------------------------|-----------------------|
| Normal (ICP<10 mmHg)   | 7.34 ± 0.01 | 39 ± 3                 | 114 ± 2               |
| Persistent ICP=20 mmHg | 7.37 ± 0.02 | 30 ± 1                 | 114 ± 4               |
| Persistent ICP=30 mmHg | 7.37 ± 0.02 | 28 ± 2                 | 109 ± 7               |
| 3 min ICP spikes       | 7.36 ± 0.01 | 32 ± 1                 | 123 ± 7               |
| 30 sec ICP spikes      | 7.40 ± 0.01 | 31 ± 1                 | 125 ± 9               |

Blood gas values are in mmHg.
